# Supplementary material
Source: PubMed Central journal article supplement (PMC9896316)
Supplement: tpmd220581.SD1.pdf [file tpmd220581.SD1.pdf]

## Supplementary Material

### Quantifying the viral reduction achieved using ash and sand as handwashing agents

Winnie Zambrana<sup>1</sup>, Jingyan Tong<sup>1</sup>, Claire E. Anderson<sup>1</sup>, Alexandria B. Boehm<sup>1\*</sup>, Marlene K. Wolfe<sup>1,2\*</sup>

1. Department of Civil & Environmental Engineering, Stanford University, 473 Via Ortega, Stanford, CA, USA, 94305

2. Gangarosa Department of Environmental Health, Rollins School of Public Health, Emory University, Atlanta, GA, USA, 30322

\*Corresponding authors

Alexandria B. Boehm, aboehm@stanford.edu, 650-724-9128

Marlene K. Wolfe, marlene.wolfe@emory.edu, 617-583-2401

**Tables S1-S5** show the results for the statistical analysis tests. For the Kruskal-Wallis test, the P-value is reported to demonstrate that a significant difference was found among the LRVs resulting from the handwashing methods by testing the null hypothesis that the data sets come from the same distribution using statistical significance of  $p=0.05$ . For the Conover-Iman test, the test statistic and P-value adjusted are both reported. The P-value adjusted indicated whether a statistically significant difference was found between each pairwise comparison using statistical significance of  $p=0.025$ . The sign of the test statistic is used to indicate the directionality of the differences (i.e., which of the two conditions in a pairwise comparison has a greater LRV).

**Table S1.** Phi6 Results Summary - Experimental results and Shapiro-Wilk and Kruskal-Wallis tests results

| Handwashing Condition   | Number of Samples/ Condition | Median Log Reduction | Min Log Reduction | Max Log Reduction | Shapiro-Wilk P-value  | Kruskal-Wallis P-value |
|-------------------------|------------------------------|----------------------|-------------------|-------------------|-----------------------|------------------------|
| Water Only (20 Sec)     |                              | 3.5                  | 1.7               | 5.6               | $7.14 \times 10^{-1}$ |                        |
| Soap and Water (20 Sec) |                              | 4.8                  | 1.5               | 6.6               | $4.72 \times 10^{-1}$ |                        |
| Ash and Water (5 Sec)   |                              | 2.8                  | 0.4               | 5.2               | $2.81 \times 10^{-1}$ |                        |

| Handwashing Condition   | Number of Samples/ Condition | Median Log Reduction | Min Log Reduction | Max Log Reduction | Shapiro-Wilk P-value  | Kruskal-Wallis P-value |
|-------------------------|------------------------------|----------------------|-------------------|-------------------|-----------------------|------------------------|
| Ash and Water (20 Sec)  | 15                           | 3.6                  | 2.0               | 5.9               | $2.15 \times 10^{-1}$ | $1.66 \times 10^{-2*}$ |
| Sand and Water (5 Sec)  |                              | 2.7                  | 0.5               | 6.2               | $6.69 \times 10^{-1}$ |                        |
| Sand and Water (20 Sec) |                              | 3.7                  | 2.0               | 5.9               | $8.45 \times 10^{-1}$ |                        |

Note: \*Statistically significant ( $p < 5.00 \times 10^{-2}$ ).

**Table S2.** Phi6 Conover-Iman Test Results - Comparison of LRVs between conditions

| Handwashing Condition   | Water Only (20 Sec)                | Soap and Water (20 Sec)            | Ash and Water (5 Sec)              | Ash and Water (20 Sec)            | Sand and Water (5 Sec)          |
|-------------------------|------------------------------------|------------------------------------|------------------------------------|-----------------------------------|---------------------------------|
| Water Only (20 Sec)     | -                                  |                                    |                                    |                                   |                                 |
| Soap and Water (20 Sec) | -2.20<br>( $2.30 \times 10^{-1}$ ) | -                                  |                                    |                                   |                                 |
| Ash and Water (5 Sec)   | 0.99<br>( $1.00 \times 10^0$ )     | 3.18<br>( $1.52 \times 10^{-2}$ )* | -                                  |                                   |                                 |
| Ash and Water (20 Sec)  | -1.01<br>( $1.00 \times 10^0$ )    | 1.19<br>( $1.00 \times 10^0$ )     | -2.00<br>( $3.66 \times 10^{-1}$ ) | -                                 |                                 |
| Sand and Water (5 Sec)  | 1.07<br>( $1.00 \times 10^0$ )     | 3.27<br>( $1.17 \times 10^{-2}$ )* | 0.08<br>( $1.00 \times 10^0$ )     | 2.08<br>( $3.02 \times 10^{-1}$ ) | -                               |
| Sand and Water (20 Sec) | -0.42<br>( $1.00 \times 10^0$ )    | 1.78<br>( $5.94 \times 10^{-1}$ )  | -1.41<br>( $1.00 \times 10^0$ )    | 0.59<br>( $1.00 \times 10^0$ )    | -1.49<br>( $1.00 \times 10^0$ ) |

Notes: Values indicate Conover-Iman test statistic and in parenthesis the P-value adjusted for Bonferroni correction; Positive test statistic value indicates Column Condition LRV > Row Condition LRV, negative test statistic value indicates Column Condition LRV < Row Condition LRV; \*statistically significant ( $p < 2.50 \times 10^{-2}$ ).

**Table S3.** MS2 experimental results summary and results of Shapiro-Wilk and Kruskal-Wallis tests

| Handwashing Condition | Number of Samples/ Condition | Median Log Reduction | Min Log Reduction | Max Log Reduction | Shapiro-Wilk P-value   | Kruskal-Wallis P-value |
|-----------------------|------------------------------|----------------------|-------------------|-------------------|------------------------|------------------------|
| Water Only (20 Sec)   |                              | 2.8                  | 2.4               | 4.2               | $7.64 \times 10^{-3*}$ |                        |

| Handwashing Condition   | Number of Samples/ Condition | Median Log Reduction | Min Log Reduction | Max Log Reduction | Shapiro-Wilk P-value  | Kruskal-Wallis P-value  |
|-------------------------|------------------------------|----------------------|-------------------|-------------------|-----------------------|-------------------------|
| Soap and Water (20 Sec) | 19                           | 2.7                  | 2.0               | 4.0               | $2.94 \times 10^{-1}$ | $3.61 \times 10^{-10*}$ |
| Ash and Water (5 Sec)   |                              | 2.0                  | 1.0               | 3.0               | $9.61 \times 10^{-1}$ |                         |
| Ash and Water (20 Sec)  |                              | 2.6                  | 1.6               | 3.5               | $5.34 \times 10^{-1}$ |                         |
| Sand and Water (5 Sec)  |                              | 1.8                  | 1.1               | 2.6               | $9.75 \times 10^{-1}$ |                         |
| Sand and Water (20 Sec) |                              | 2.4                  | 1.3               | 3.5               | $1.70 \times 10^{-1}$ |                         |

Note: \*Statistically significant ( $p < 5.00 \times 10^{-2}$ )

**Table S4.** MS2 Conover-Iman Test Results - Comparison between conditions

| Handwashing Condition   | Water Only (20 Sec)                 | Water and Soap (20 Sec)            | Ash and Water (5 Sec)               | Ash and Water (20 Sec)             | Sand and Water (5 Sec)              |
|-------------------------|-------------------------------------|------------------------------------|-------------------------------------|------------------------------------|-------------------------------------|
| Water Only (20 Sec)     | -                                   |                                    |                                     |                                    |                                     |
| Soap and Water (20 Sec) | 0.80<br>( $1.00 \times 10^0$ )      | -                                  |                                     |                                    |                                     |
| Ash and Water (5 Sec)   | 6.50<br>( $1.88 \times 10^{-8}$ )*  | 5.71<br>( $7.71 \times 10^{-7}$ )* | -                                   |                                    |                                     |
| Ash and Water (20 Sec)  | 3.05<br>( $2.15 \times 10^{-2}$ )*  | 2.25<br>( $1.97 \times 10^{-1}$ )  | -3.45<br>( $5.95 \times 10^{-3}$ )* | -                                  |                                     |
| Sand and Water (5 Sec)  | 7.83<br>( $2.65 \times 10^{-11}$ )* | 7.03<br>( $1.44 \times 10^{-9}$ )* | 1.33<br>( $1.00 \times 10^0$ )      | 4.78<br>( $4.15 \times 10^{-5}$ )* | -                                   |
| Sand and Water (20 Sec) | 3.61<br>( $3.45 \times 10^{-3}$ )*  | 2.81<br>( $4.35 \times 10^{-2}$ )  | -2.89<br>( $3.49 \times 10^{-2}$ )  | 0.56<br>( $1.00 \times 10^0$ )     | -4.22<br>( $3.84 \times 10^{-4}$ )* |

Notes: Values indicate Conover-Iman test statistic and in parenthesis the P-value adjusted for Bonferroni correction; Positive test statistic value indicates Column Condition LRV > Row Condition LRV, negative test statistic value indicates Column Condition LRV < Row Condition LRV; \*statistically significant ( $p < 2.50 \times 10^{-2}$ ).

**Table S5.** Results of comparison of LRVs between bacteriophages (MS2 LRVs against Phi6 LRVs) per condition using Kruskal-Wallis and Conover-Iman tests

| <b>Handwashing Condition</b>   | <b>Kruskal-Wallis P-value</b> | <b>Conover-Iman Test Statistic</b> | <b>Conover-Iman P- value Adjusted</b> |
|--------------------------------|-------------------------------|------------------------------------|---------------------------------------|
| <b>Water Only (20 Sec)</b>     | 3.29 x 10 <sup>-2</sup> *     | -2.26<br>(MS2 < Phi6)              | 1.53x 10 <sup>-2</sup> **             |
| <b>Soap and Water (20 Sec)</b> | 1.68 x 10 <sup>-4</sup> *     | -4.90<br>(MS2 < Phi6)              | 1.31x 10 <sup>-5</sup> **             |
| <b>Ash and Water (5 Sec)</b>   | 1.23 x 10 <sup>-1</sup>       | -                                  | -                                     |
| <b>Ash and Water (20 Sec)</b>  | 1.05 x 10 <sup>-3</sup> *     | -3.93<br>(MS2 < Phi6)              | 2.13 x 10 <sup>-4</sup> **            |
| <b>Sand and Water (5 Sec)</b>  | 7.41 x 10 <sup>-2</sup> *     | -                                  | -                                     |
| <b>Sand and Water (20 Sec)</b> | 2.53 x 10 <sup>-4</sup> *     | -4.67<br>(MS2 < Phi6)              | 2.55 x 10 <sup>-5</sup> **            |

**Notes:** \*Statistically significant ( $p < 5.00 \times 10^{-2}$ ), \*\*P-value adjusted for Bonferroni correction, statistically significant ( $p < 2.50 \times 10^{-2}$ ).
